# Supplementary material for: Both the Caspase CSP-1 and a Caspase-Independent Pathway Promote Programmed Cell Death in Parallel to the Canonical Pathway for Apoptosis in Caenorhabditis elegans
Source: PubMed Central journal article supplement (PMC3591282; doi:10.1371/journal.pgen.1003341), 2013-03-07

# Figure S1

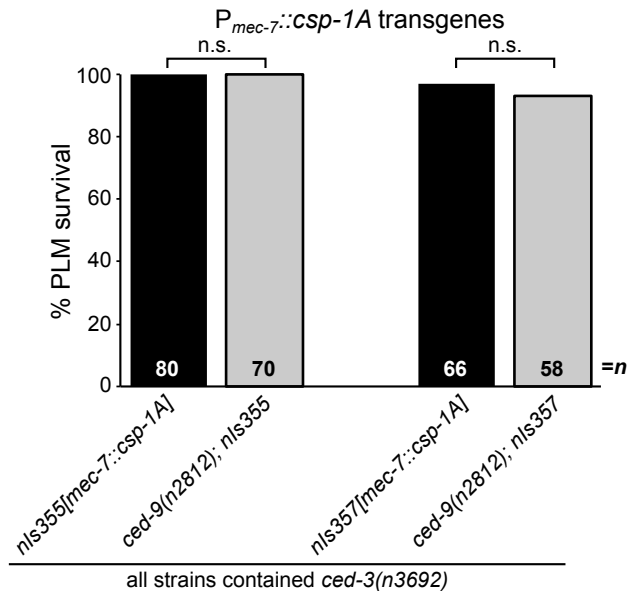

Supplement: pgen.1003341.s001.pdf [file pgen.1003341.s001.pdf]
